# Supplementary material for: Development of a Semi-Mechanistic Modeling Framework for Wet Bead Milling of Pharmaceutical Nanosuspensions
Source: MDPI journal article supplement (doi:10.3390/pharmaceutics16030394), 2024-03-13
Supplement: s1 [file s1]

# SUPPLEMENTARY MATERIALS

## Development of a Semi-Mechanistic Modeling Framework for Wet Bead Milling of Pharmaceutical Nanosuspensions

Donald J. Clancy <sup>1,\*</sup>, Gulenay Guner <sup>1,2,†</sup>, Sayantan Chattoraj <sup>1</sup>, Helen Yao <sup>1</sup>, M. Connor Faith <sup>1</sup>, Zahra Salahshoor <sup>1</sup>, Kailey N. Martin <sup>1</sup> and Ecevit Bilgili <sup>2</sup>

<sup>1</sup> GlaxoSmithKline R&D, Collegeville, PA 19426, USA

<sup>2</sup> Otto H. York Department of Chemical and Materials Engineering, New Jersey Institute of Technology, Newark, NJ 07102, USA

\* Correspondence: donald.j.clancy@gsk.com

† Primary authors contributed equally to this work.

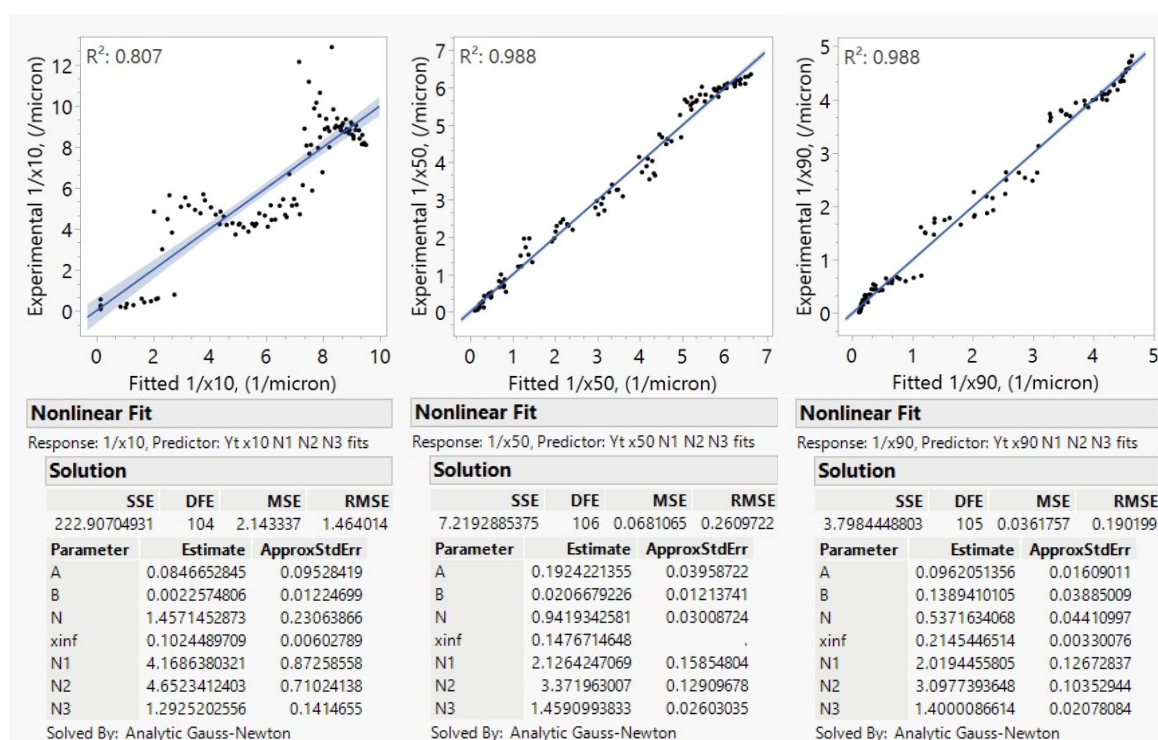

**Figure S1.** Parity plots and model fits for fenofibrate drug product / Microcer dataset for  $1/x_{10}$ ,  $1/x_{50}$ ,  $1/x_{90}$  from Model B (Eq. (5) with N1, N2, and N3 as fitted parameters (see Section 4.2.2) (Note: for  $x_{10}$  quantile, A fit is not significant).

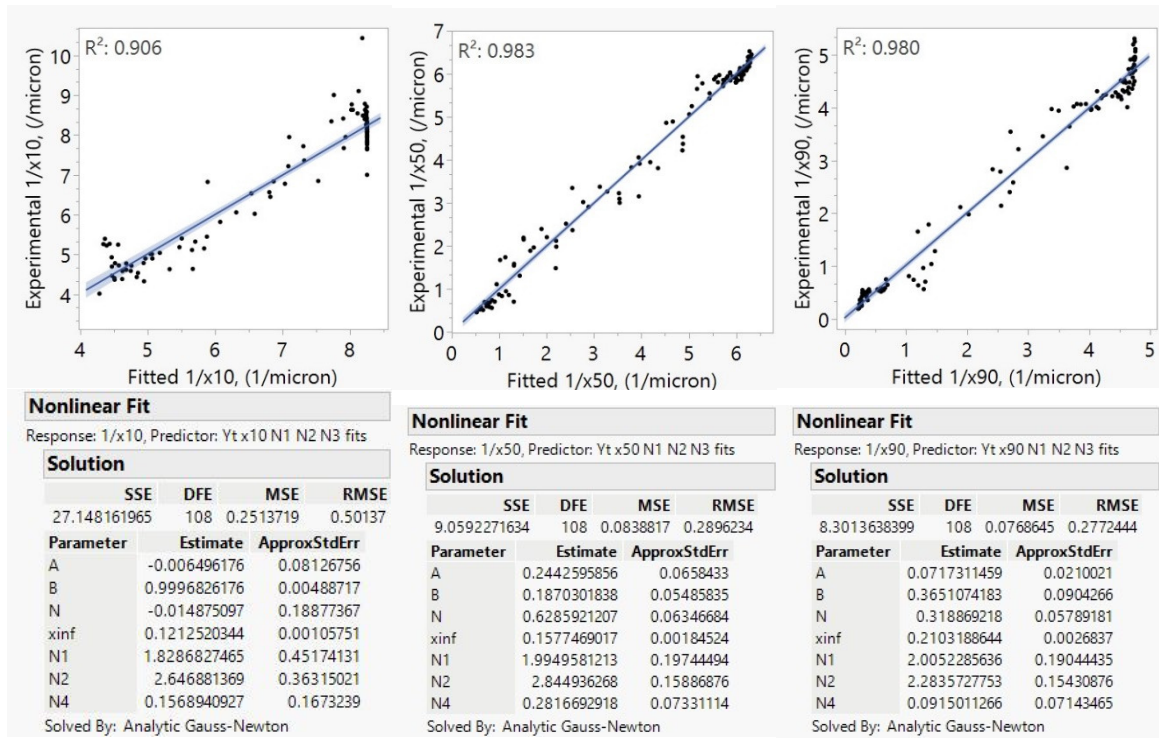

**Figure S2.** Parity plots and model fits for griseofulvin drug product / Microcer dataset for  $1/x_{10}$ ,  $1/x_{50}$ ,  $1/x_{90}$  from Model B (Eq. (5) with  $N_1$ ,  $N_2$ , and  $N_4$  as fitted parameters (see Section 4.2.3). (Note: for  $x_{10}$  quantile, A and  $N_4$  fit is not significant, for  $x_{90}$  quantile,  $N_4$  fit was not significant.)

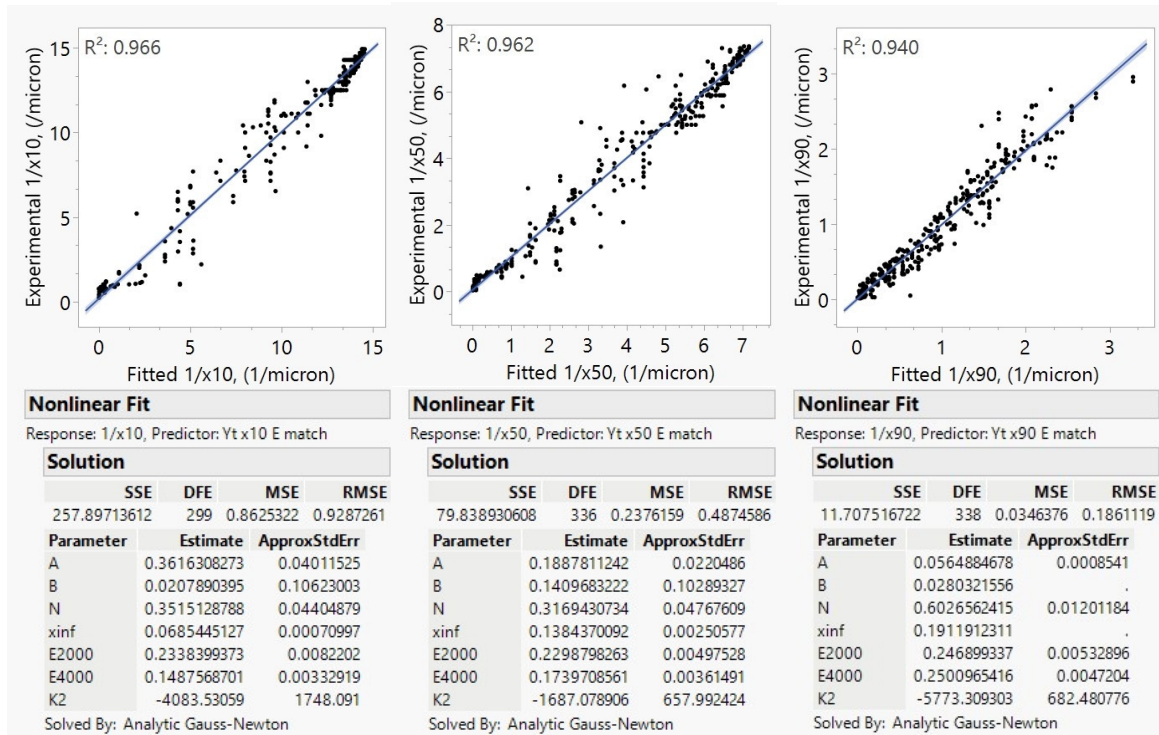

**Figure S3.** Mill scale efficiency factor parity plots and fits for DV300 DV2000 and DV4000 for DP1.

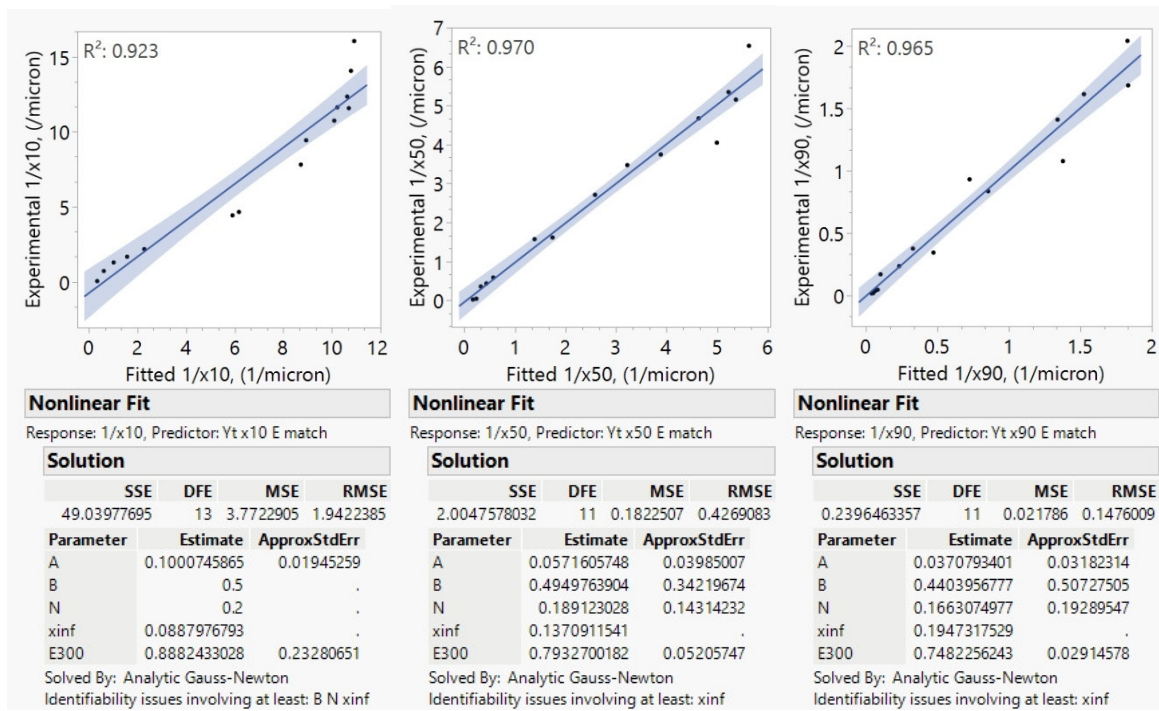

**Figure S4.** Mill scale efficiency factor parity plots and fits for DV300 for DP2. Note: Since the datasets are missing timepoints from the first 2 hours of milling, the intercept term could not be predicted significantly and fixed.

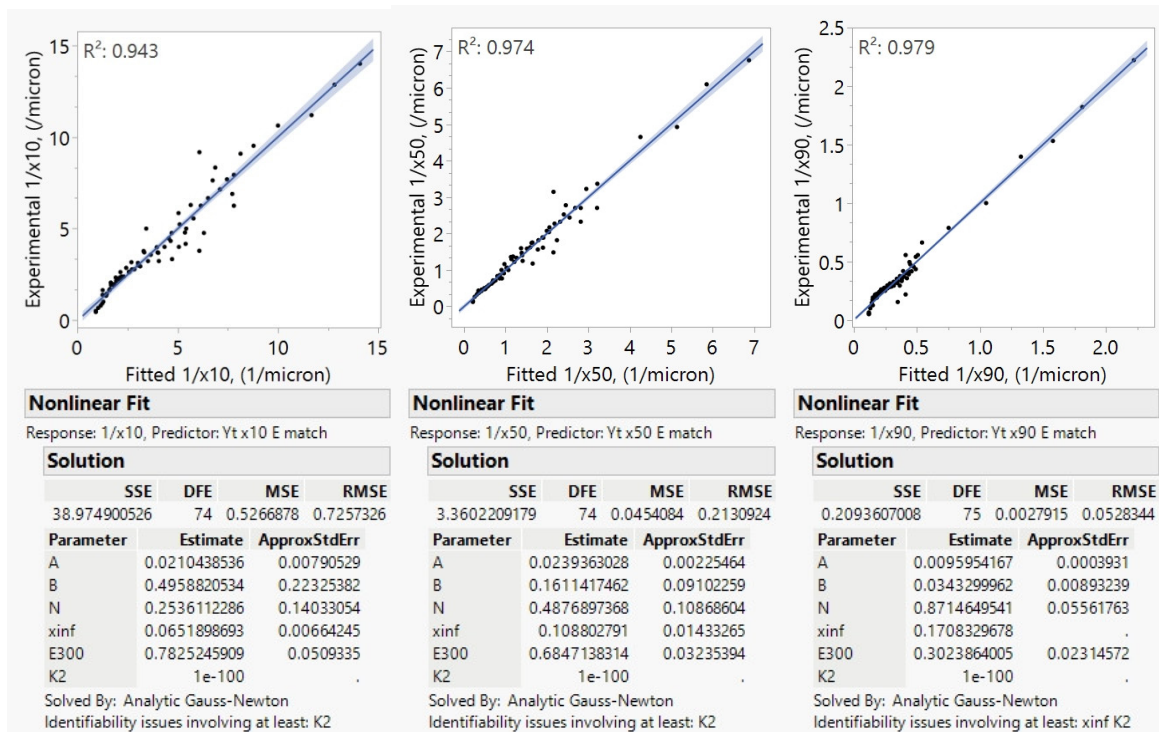

**Figure S5.** Mill scale efficiency factor parity plots and fits for DV300 for DP3. Eq. (11) was also used for the bead loading term as part of this fitting exercise.



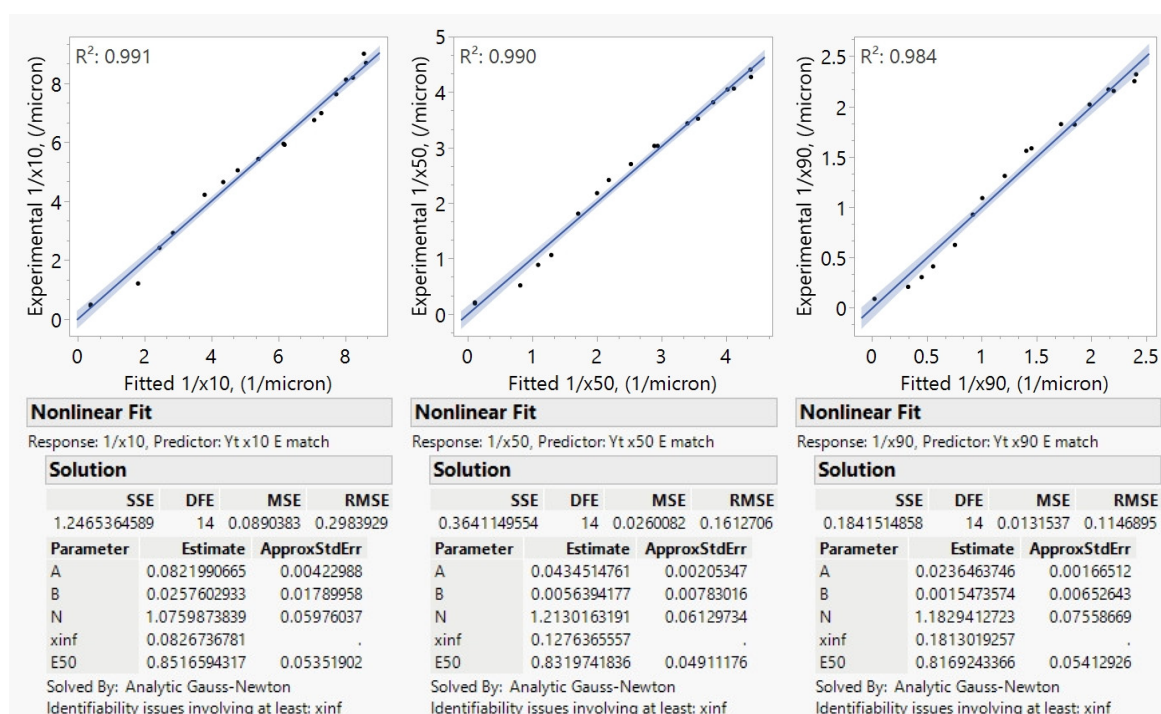

Figure S6. Mill scale efficiency factor parity plots and fits for DV50 for DP4.

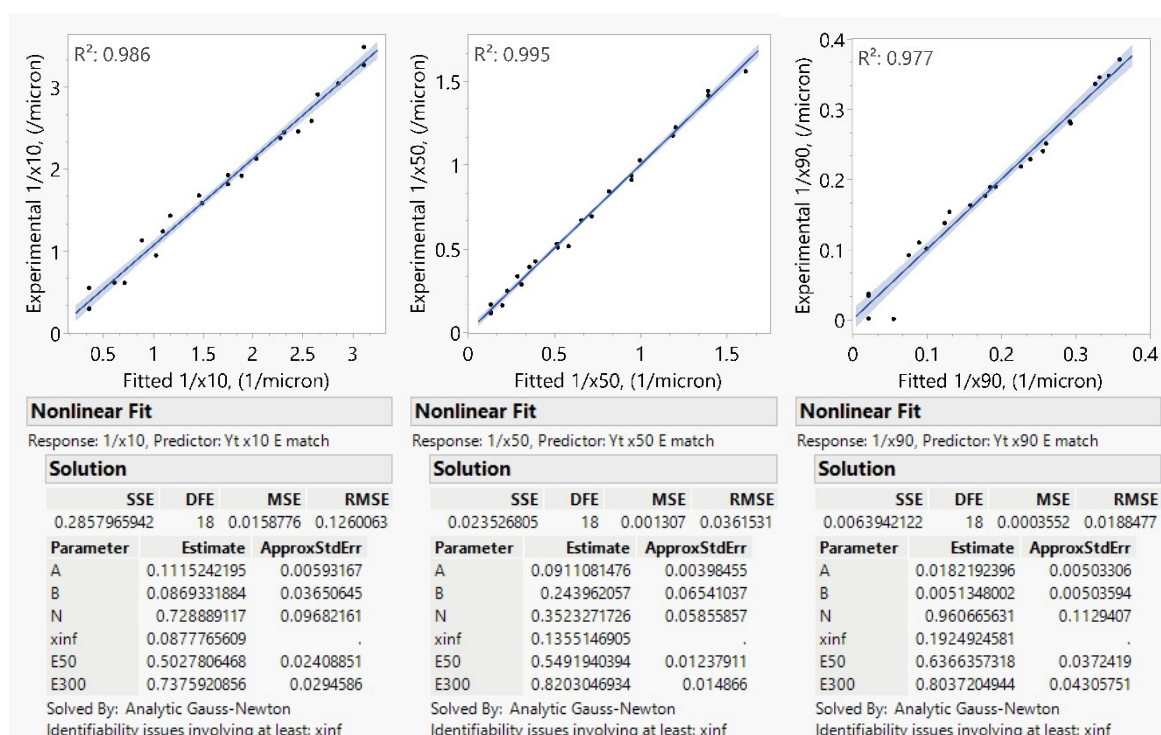

Figure S7. Mill scale efficiency factor parity plots and fits for DV50 and DV300 for DP6.

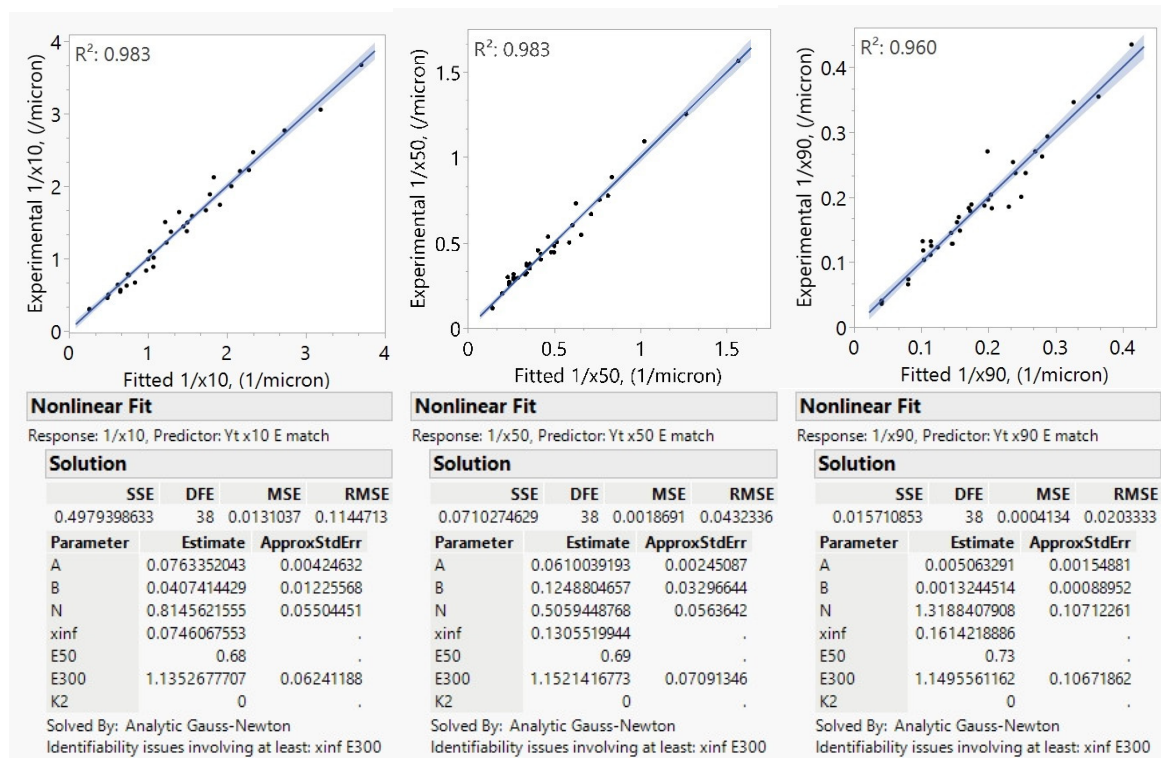

**Figure S8.** Mill scale efficiency factor parity plots and fits for DV300 for DP5, with DV50 efficiency assumed to be the average of the previously fitted values in **Figures S6** and **S7** for DP5.

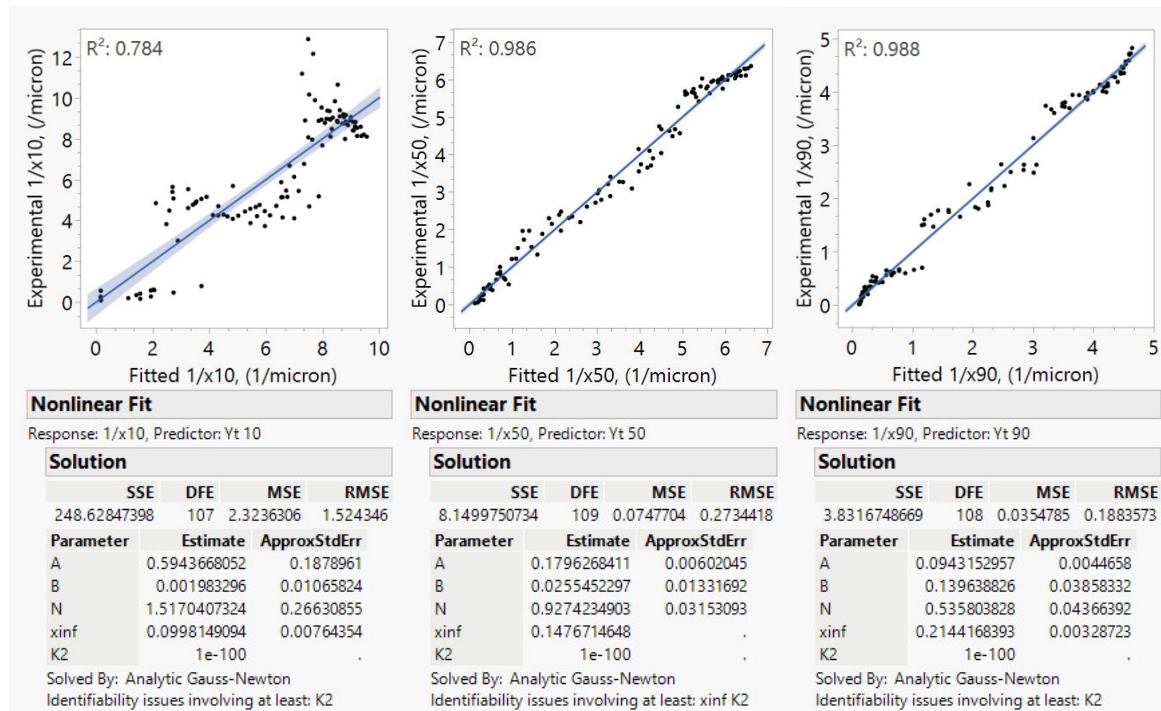

**Figure S9.** Parity plots and model fits for NJIT bead material case study in section 4.2.2 (fenofibrate), assuming mill scale efficiency factor is 100%, using Model C (Eq. (10)).

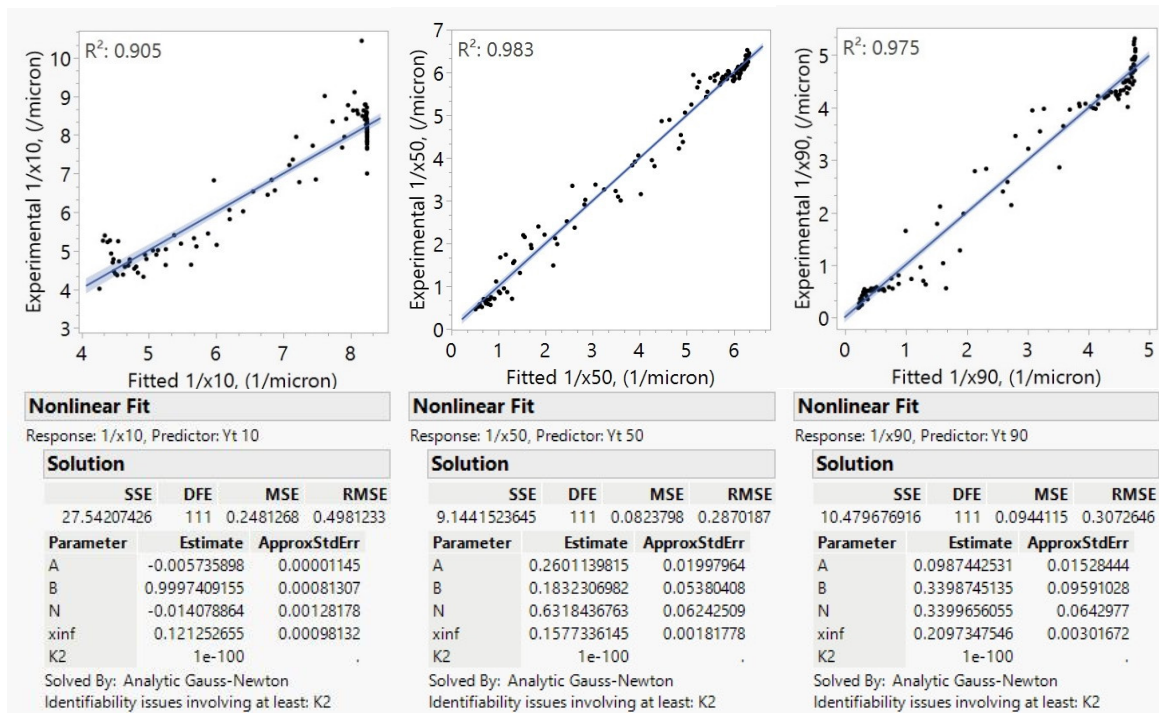

**Figure S10.** Parity plots and model fits for NJIT bead size case study in section 4.2.3 (griseofulvin), assuming mill efficiency is 100%, using Model C (Eq. (10)).

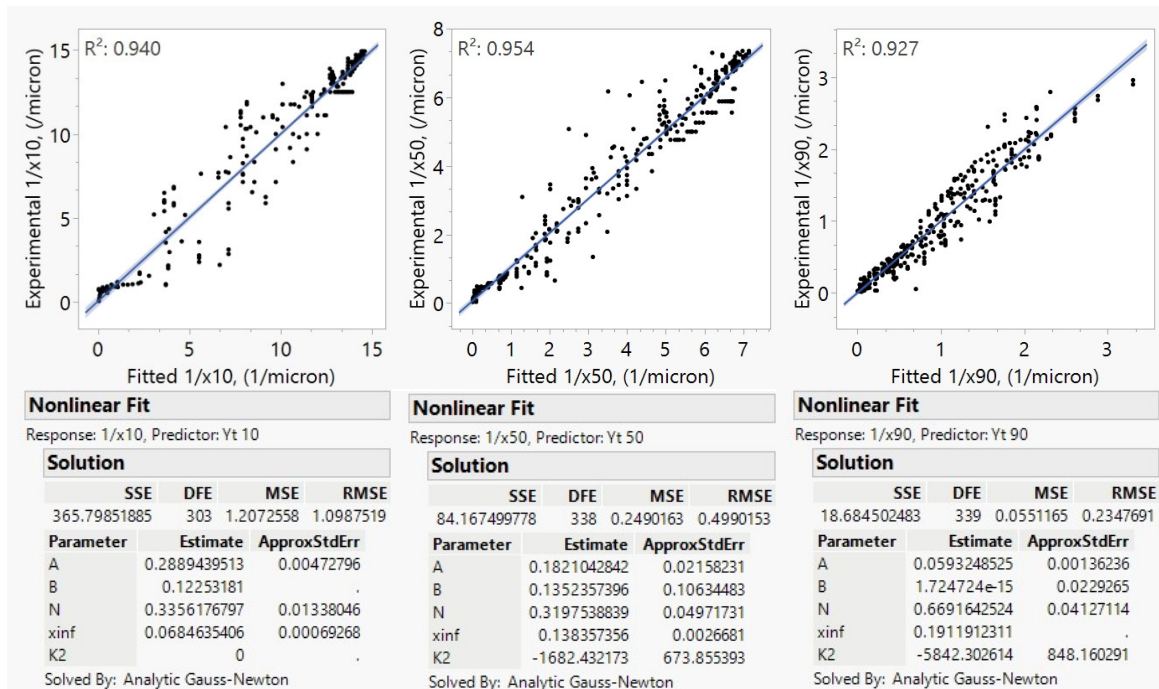

**Figure S11.** Parity plots and model fits for DP1, using Model C (Eq. (10)).



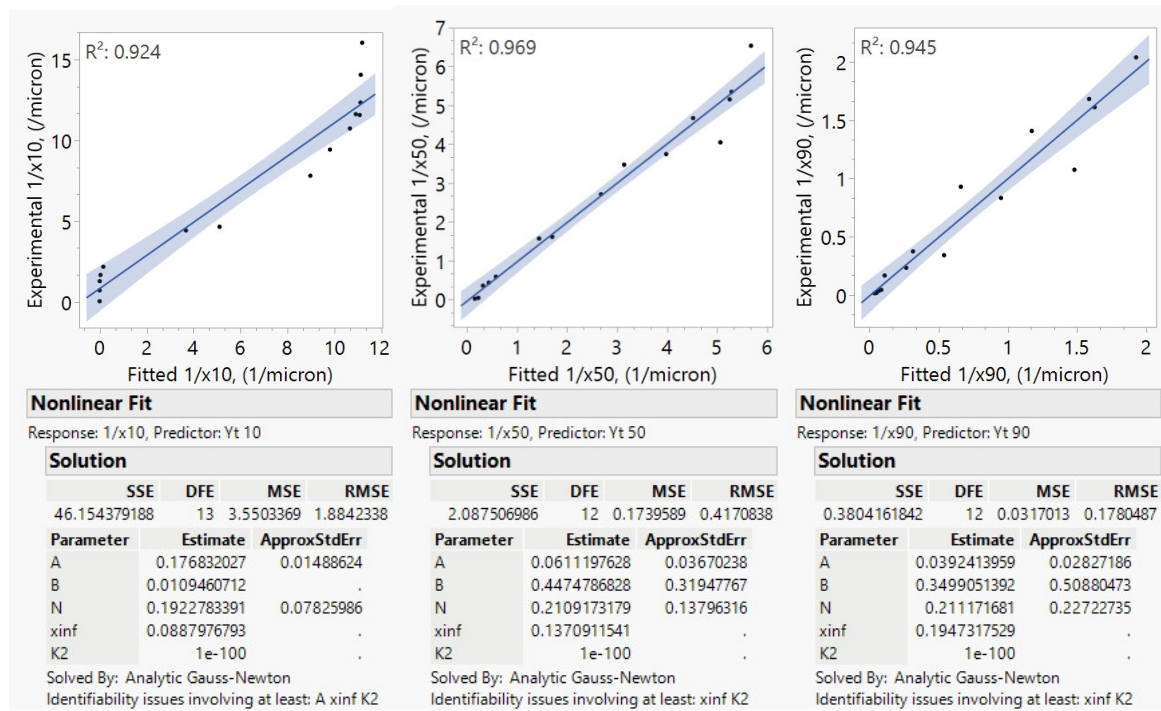

Figure S12. Parity plots and model fits for DP2 using Model C (Eq. (10)).

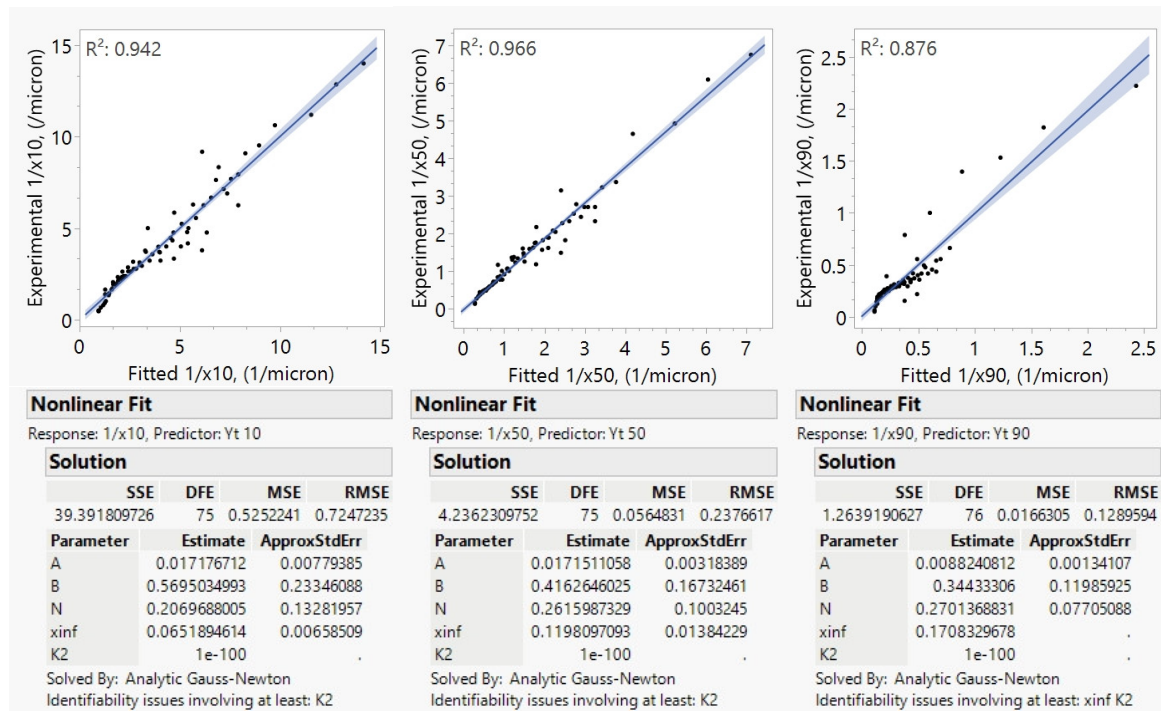

Figure S13. Parity plots and model fits for DP3 using Model C (Eq. (10)). Here, Eq. (11) was used for the bead loading term since there were experiments with >95% bead loading.

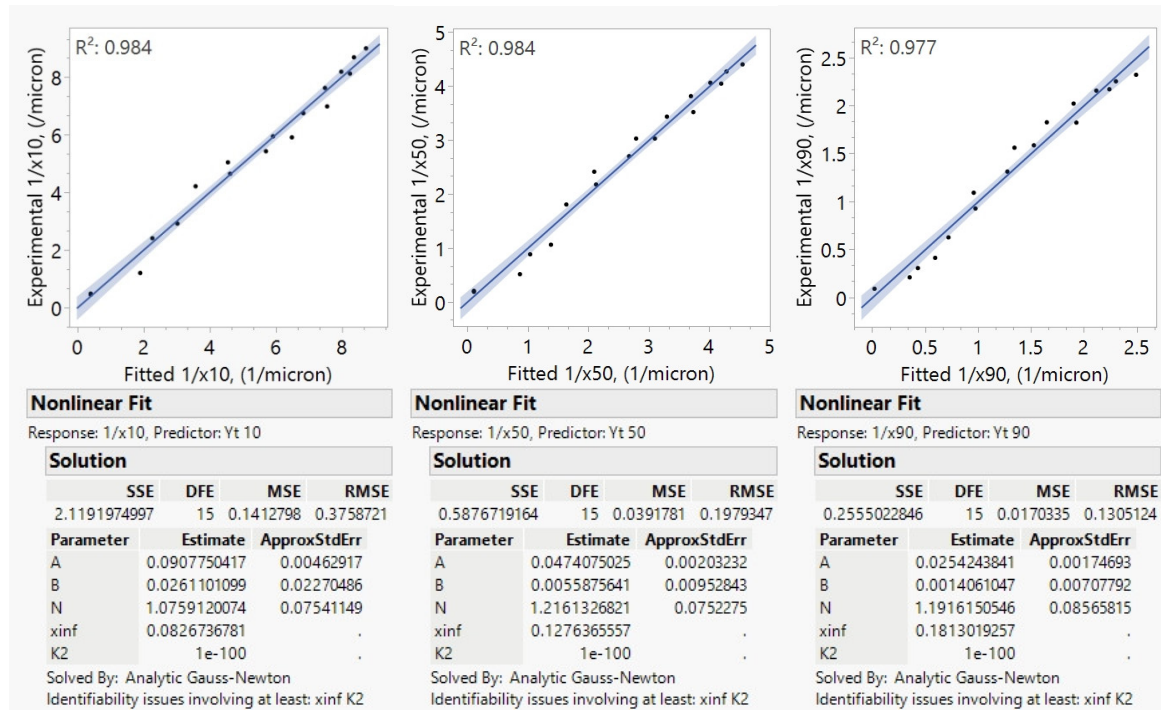

Figure S14. Parity plots and model fits for DP4 using Model C (Eq. (10)).

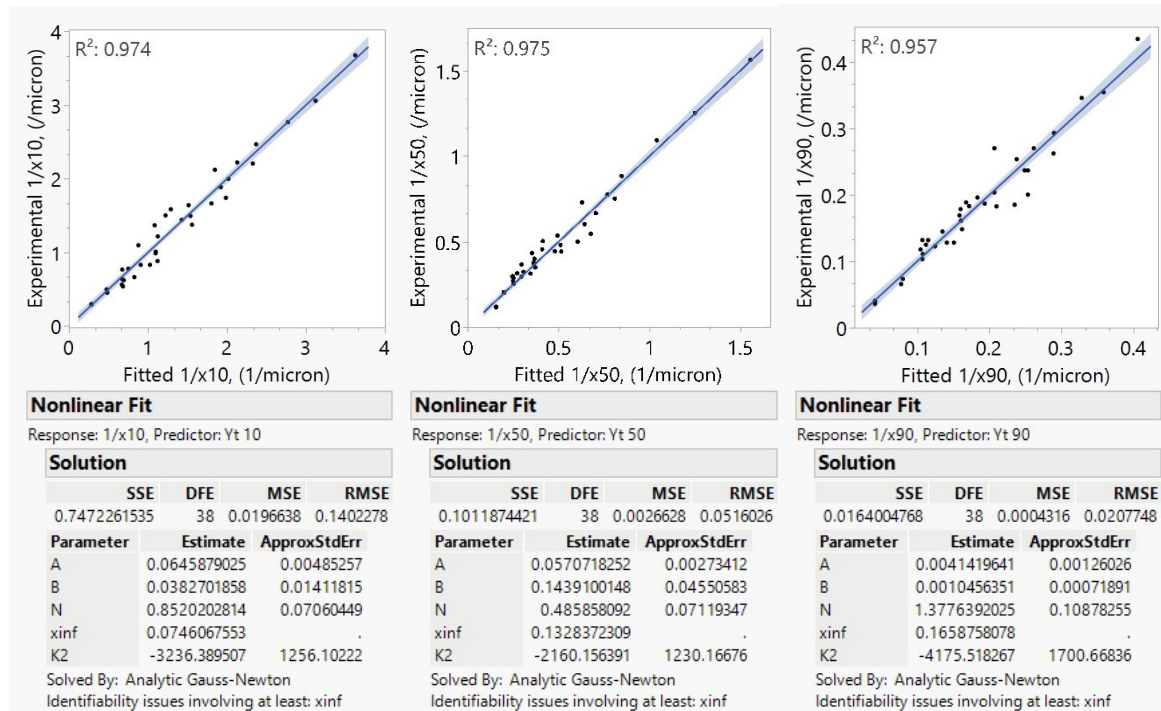

Figure S15. Parity plots and model fit for DP5 using Model C (Eq. (10)).



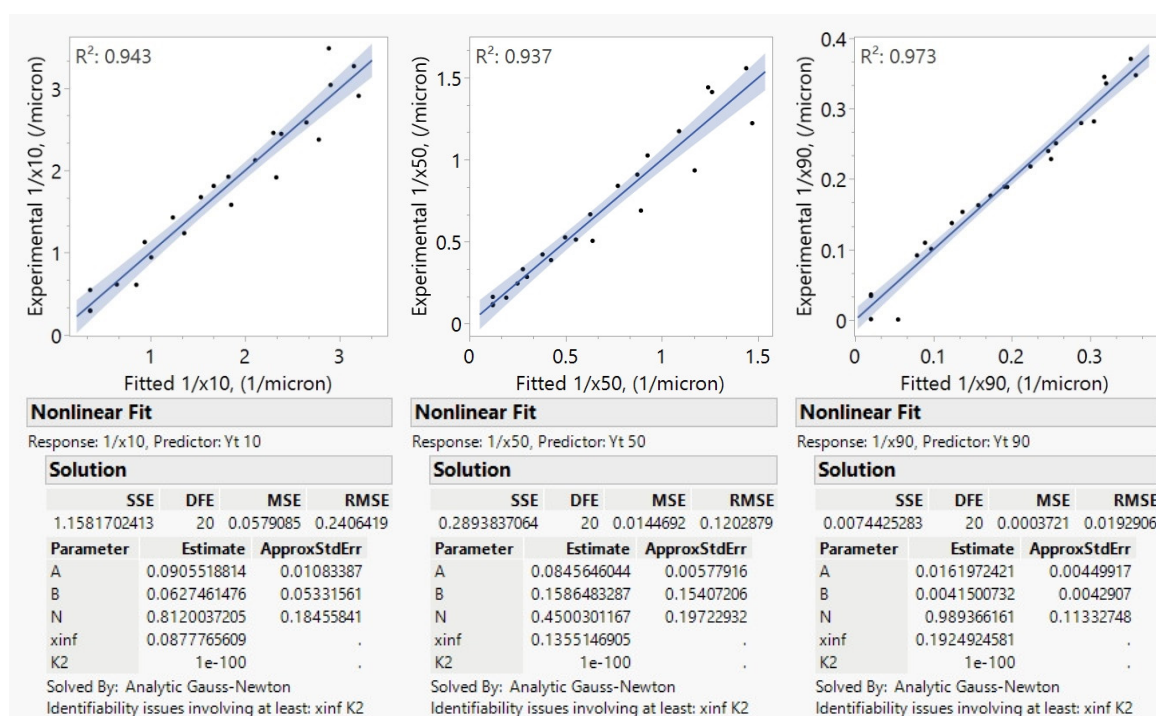

Figure S16. Parity plots and model fits for DP6 using Model C (Eq. (10)).
